# Supplementary material for: Post-reproductive parthenogenetic pea aphids (Acyrthosiphon pisum) are visually identifiable and disproportionately positioned distally to clonal colonies
Source: PeerJ. 2016 Oct 26;4:e2631. doi: 10.7717/peerj.2631 (PMC5088610; doi:10.7717/peerj.2631)
Supplement: Supplemental Information 1 — The experiment was done in five sessions, each represented by a different box. Each box notes the day of the experiment for that given session when analyzing the clip-cage method. The presence of nymphs was marked every two days for the clip-cage method. If nymphs were present, the corresponding row was marked with “Nymphs” and if no nymphs were present, it was marked with “0.” Below each box, the results for both the clip-cage method and dissection method are labeled with either “R” for reproductive, or “P” for post-reproductive. [file peerj-04-2631-s001.xlsx]

## Sheet: Raw Data - Sheet1.csv
	Position	1	2	3	4	5	6	7	8	9	10	11	12	13	14	15	16	17	18
Day of Experiment	Experiment
2	1	Nymphs	Nymphs	Nymphs	Nymphs	Nymphs	Nymphs	Nymphs	Nymphs	Nymphs	Nymphs	Nymphs
4	1	Nymphs	Nymphs	Nymphs	Nymphs	Nymphs	Nymphs	Nymphs	Nymphs	Nymphs	Nymphs	Nymphs
6	1	Nymphs	Nymphs	Nymphs	Nymphs	Nymphs	Nymphs	Nymphs	Nymphs	Nymphs	Nymphs	Nymphs
8	1	Nymphs	Nymphs	Nymphs	Nymphs	Nymphs	Nymphs	Nymphs	Nymphs	Nymphs	Nymphs	Nymphs
10	1	Nymphs	Nymphs	Nymphs	0	Nymphs	Nymphs	Nymphs	Nymphs	Nymphs	Nymphs	Nymphs
12	1	Nymphs	Nymphs	Nymphs	Nymphs	0	Nymphs	Nymphs	Nymphs	Nymphs	Nymphs	Nymphs
14	1	Nymphs	0	Nymphs	0	0	Nymphs	Nymphs	Nymphs	Nymphs	Nymphs	Nymphs
16	1	Nymphs	0	Nymphs	0	0	0	Nymphs	0	Nymphs	Nymphs	0
18	1	Nymphs	0	Nymphs	0	0	0	Nymphs	0	Nymphs	Nymphs	0
Clip Cage Method		R	P	R	P	P	P	R	P	R	R	P
Dissection Method		R	P	R	P	P	P	R	P	R	R	P
2	2	Nymphs	Nymphs	Nymphs	Nymphs	Nymphs	Nymphs	Nymphs	Nymphs
4	2	Nymphs	Nymphs	Nymphs	Nymphs	Nymphs	Nymphs	Nymphs	Nymphs
6	2	Nymphs	Nymphs	Nymphs	Nymphs	Nymphs	Nymphs	Nymphs	Nymphs
8	2	Nymphs	Nymphs	Nymphs	Nymphs	Nymphs	Nymphs	Nymphs	Nymphs
10	2	Nymphs	Nymphs	Nymphs	Nymphs	Nymphs	Nymphs	Nymphs	Nymphs
12	2	Nymphs	Nymphs	Nymphs	Nymphs	Nymphs	Nymphs	Nymphs	Nymphs
14	2	Nymphs	Nymphs	Nymphs	0	Nymphs	Nymphs	Nymphs	Nymphs
16	2	Nymphs	Nymphs	Nymphs	0	Nymphs	Nymphs	Nymphs	Nymphs
18	2	Nymphs	Nymphs	Nymphs	0	Nymphs	Nymphs	0	Nymphs
20	2	Nymphs	Nymphs	0	0	Nymphs	0	Nymphs	Nymphs
22	2	0	Nymphs	0	0	Nymphs	0	0	Nymphs
24	2	0	Nymphs	0	0	Nymphs	0	0	Nymphs
Clip Cage Method		P	R	P	P	R	P	P	R
Dissection Method		P	R	P	P	R	P	P	R
2	3	Nymphs	Nymphs	Nymphs	Nymphs	Nymphs	Nymphs	Nymphs	Nymphs	Nymphs	Nymphs	Nymphs	Nymphs	Nymphs
4	3	Nymphs	Nymphs	Nymphs	Nymphs	Nymphs	Nymphs	Nymphs	Nymphs	Nymphs	Nymphs	Nymphs	Nymphs	Nymphs
6	3	Nymphs	Nymphs	Nymphs	Nymphs	Nymphs	Nymphs	Nymphs	Nymphs	Nymphs	Nymphs	Nymphs	Nymphs	Nymphs
8	3	Nymphs	Nymphs	Nymphs	Nymphs	Nymphs	Nymphs	Nymphs	Nymphs	Nymphs	Nymphs	Nymphs	Nymphs	Nymphs
10	3	Nymphs	Nymphs	Nymphs	Nymphs	Nymphs	Nymphs	Nymphs	Nymphs	Nymphs	Nymphs	Nymphs	Nymphs	Nymphs
12	3	Nymphs	Nymphs	Nymphs	Nymphs	Nymphs	Nymphs	Nymphs	Nymphs	Nymphs	Nymphs	Nymphs	Nymphs	Nymphs
14	3	Nymphs	Nymphs	Nymphs	Nymphs	Nymphs	Nymphs	Nymphs	Nymphs	Nymphs	Nymphs	Nymphs	Nymphs	Nymphs
16	3	Nymphs	Nymphs	Nymphs	Nymphs	Nymphs	Nymphs	Nymphs	Nymphs	Nymphs	Nymphs	Nymphs	Nymphs	Nymphs
18	3	Nymphs	Nymphs	Nymphs	0	Nymphs	Nymphs	Nymphs	Nymphs	Nymphs	Nymphs	Nymphs	Nymphs	Nymphs
20	3	Nymphs	Nymphs	0	0	Nymphs	0	0	Nymphs	Nymphs	Nymphs	Nymphs	Nymphs	0
22	3	Nymphs	Nymphs	0	0	Nymphs	0	0	Nymphs	Nymphs	Nymphs	Nymphs	Nymphs	0
Clip Cage Method		R	R	P	P	R	P	P	R	R	R	R	R	P
Eyespot Method		R	R	P	P	R	P	P	R	R	R	R	R	P
Dissection Method		R	R	P	P	R	P	P	R	R	R	R	R	P
2	4	Nymphs	Nymphs	Nymphs	Nymphs	Nymphs	Nymphs	Nymphs
4	4	Nymphs	Nymphs	Nymphs	Nymphs	Nymphs	Nymphs	Nymphs
6	4	Nymphs	Nymphs	Nymphs	Nymphs	Nymphs	Nymphs	Nymphs
8	4	Nymphs	Nymphs	Nymphs	Nymphs	Nymphs	Nymphs	Nymphs
10	4	Nymphs	Nymphs	Nymphs	Nymphs	Nymphs	Nymphs	Nymphs
12	4	Nymphs	Nymphs	Nymphs	Nymphs	Nymphs	Nymphs	Nymphs
14	4	Nymphs	Nymphs	Nymphs	Nymphs	Nymphs	Nymphs	Nymphs
16	4	Nymphs	0	Nymphs	Nymphs	Nymphs	Nymphs	Nymphs
18	4	Nymphs	Nymphs	Nymphs	Nymphs	Nymphs	Nymphs	Nymphs
20	4	Nymphs	Nymphs	Nymphs	Nymphs	Nymphs	0	Nymphs
22	4	Nymphs	Nymphs	Nymphs	Nymphs	Nymphs	0	0
24	4	Nymphs	Nymphs	0	Nymphs	Nymphs	0	0
26	4	Nymphs	Nymphs	0	Nymphs	Nymphs	0	0
Clip Cage Method		R	R	P	R	R	P	P
Eyespot Method		R	R	P	R	R	P	P
Dissection Method		R	R	P	R	R	P	P
2	5	Nymphs	Nymphs	Nymphs	Nymphs	Nymphs	Nymphs	Nymphs	Nymphs	Nymphs	Nymphs	Nymphs	Nymphs	Nymphs	Nymphs	Nymphs	Nymphs	Nymphs	Nymphs
4	5	Nymphs	Nymphs	Nymphs	Nymphs	Nymphs	Nymphs	Nymphs	Nymphs	Nymphs	Nymphs	Nymphs	Nymphs	Nymphs	Nymphs	Nymphs	Nymphs	Nymphs	Nymphs
6	5	Nymphs	Nymphs	Nymphs	Nymphs	Nymphs	Nymphs	Nymphs	Nymphs	Nymphs	Nymphs	Nymphs	Nymphs	Nymphs	Nymphs	Nymphs	Nymphs	Nymphs	Nymphs
8	5	Nymphs	Nymphs	Nymphs	Nymphs	Nymphs	Nymphs	Nymphs	Nymphs	Nymphs	Nymphs	Nymphs	Nymphs	Nymphs	Nymphs	Nymphs	Nymphs	Nymphs	Nymphs
10	5	Nymphs	Nymphs	Nymphs	Nymphs	Nymphs	Nymphs	Nymphs	Nymphs	Nymphs	Nymphs	Nymphs	Nymphs	Nymphs	Nymphs	Nymphs	Nymphs	Nymphs	Nymphs
12	5	Nymphs	Nymphs	Nymphs	Nymphs	Nymphs	Nymphs	Nymphs	Nymphs	Nymphs	Nymphs	Nymphs	Nymphs	Nymphs	Nymphs	Nymphs	Nymphs	Nymphs	Nymphs
14	5	Nymphs	Nymphs	Nymphs	Nymphs	Nymphs	Nymphs	Nymphs	Nymphs	Nymphs	Nymphs	Nymphs	Nymphs	Nymphs	Nymphs	Nymphs	Nymphs	Nymphs	Nymphs
16	5	Nymphs	Nymphs	Nymphs	Nymphs	Nymphs	Nymphs	Nymphs	Nymphs	Nymphs	Nymphs	Nymphs	Nymphs	Nymphs	Nymphs	Nymphs	Nymphs	Nymphs	Nymphs
18	5	Nymphs	Nymphs	Nymphs	Nymphs	Nymphs	0	0	Nymphs	Nymphs	Nymphs	Nymphs	Nymphs	Nymphs	Nymphs	Nymphs	Nymphs	0	Nymphs
20	5	Nymphs	0	0	Nymphs	Nymphs	Nymphs	0	Nymphs	Nymphs	Nymphs	Nymphs	0	Nymphs	Nymphs	Nymphs	Nymphs	0	Nymphs
22	5	Nymphs	0	0	Nymphs	Nymphs	Nymphs	0	Nymphs	Nymphs	0	Nymphs	0	Nymphs	0	Nymphs	Nymphs	0	Nymphs
24	5	Nymphs	0	0	Nymphs	Nymphs	Nymphs	0	Nymphs	Nymphs	0	Nymphs	0	Nymphs	0	Nymphs	Nymphs	0	Nymphs
Clip Cage Method		R	P	P	R	R	R	P	R	R	P	R	P	R	P	R	R	P	R
Eyespot Method		R	P	P	R	R	R	P	R	R	P	R	P	R	P	R	R	P	R
Dissection Method		R	P	P	R	R	R	P	R	R	P	R	P	R	P	R	R	P	R
Notes: For each census, each individual was recorded as having either "Nymphs" or "0" Nymphs. For each method, each individual was recorded as either being reproductive "R" or post-reproductive "P".
